# Supplementary material
Source: bioRxiv or medRxiv preprint supplement (https://medrxiv.org/highwire/filestream/80649/field_highwire_adjunct_files/3/2020.05.08.20095943-3.pdf)
Supplement: Supplementary file [file 2020.05.08.20095943-3.pdf]

Table 1 Case fatality Rate (CFR%) and Relative Risk (RR) calculation among Women and men from different age groups (N=9,468) using a significant level of 0.05%.

| Age             | Female     |           |              | Male       |           |               | RR           | Lower          | Upper          | P Value        | Risk        |
|-----------------|------------|-----------|--------------|------------|-----------|---------------|--------------|----------------|----------------|----------------|-------------|
|                 | Alive      | Death     | CFR%         | Alive      | Death     | CFR%          |              | limit (CI 95%) | limit (CI 95%) |                |             |
| <b>0 to 4</b>   | 13         | 1         | 7.14%        | 24         | 0         | 0.00%         | 0.2          | 0.0087         | 4.6023         | 0.3145         | -80%        |
| <b>5 to 9</b>   | 29         | 1         | 3.33%        | 37         | 0         | 0.00%         | 0.27         | 0.0115         | 6.4437         | 0.806          | -73%        |
| <b>10 to 14</b> | 26         | 0         | 0.00%        | 37         | 0         | 0.00%         | 0.71         | 0.0145         | 4.7119         | 0.8632         | -29%        |
| <b>15 to 19</b> | 55         | 0         | 0.00%        | 60         | 0         | 0.00%         | 0.92         | 0.0185         | 5.4976         | 0.9657         | -8%         |
| <b>20 to 24</b> | 175        | 0         | 0.00%        | 134        | 0         | 0.00%         | 1.3          | 0.026          | 9.2868         | 0.8943         | 30%         |
| <b>25 to 29</b> | 482        | 2         | 0.41%        | 471        | 2         | 0.42%         | 1.02         | 0.1447         | 7.2347         | 0.9816         | 2%          |
| <b>30 to 34</b> | 627        | 3         | 0.48%        | 717        | 6         | 0.83%         | 1.7427       | 0.4376         | 6.9397         | 0.4308         | 74%         |
| <b>35 to 39</b> | <b>474</b> | <b>3</b>  | <b>0.63%</b> | <b>627</b> | <b>14</b> | <b>2.18%</b>  | <b>3.47</b>  | <b>1.0036</b>  | <b>8.0162</b>  | <b>0.0493*</b> | <b>247%</b> |
| <b>40 to 44</b> | <b>428</b> | <b>5</b>  | <b>1.15%</b> | <b>567</b> | <b>24</b> | <b>4.06%</b>  | <b>3.516</b> | <b>1.3526</b>  | <b>9.1436</b>  | <b>0.0099*</b> | <b>252%</b> |
| <b>45 to 49</b> | <b>372</b> | <b>4</b>  | <b>1.06%</b> | <b>476</b> | <b>26</b> | <b>5.18%</b>  | <b>4.86</b>  | <b>1.7136</b>  | <b>11.8316</b> | <b>0.003*</b>  | <b>386%</b> |
| <b>50 to 54</b> | <b>350</b> | <b>12</b> | <b>3.31%</b> | <b>451</b> | <b>33</b> | <b>6.82%</b>  | <b>2.05</b>  | <b>1.0775</b>  | <b>3.9263</b>  | <b>0.0288*</b> | <b>105%</b> |
| <b>55 to 59</b> | <b>368</b> | <b>9</b>  | <b>2.39%</b> | <b>410</b> | <b>41</b> | <b>9.09%</b>  | <b>3.80</b>  | <b>1.8752</b>  | <b>7.7332</b>  | <b>0.0002*</b> | <b>280%</b> |
| <b>60 to 64</b> | <b>250</b> | <b>21</b> | <b>7.75%</b> | <b>339</b> | <b>58</b> | <b>14.61%</b> | <b>1.88</b>  | <b>1.1728</b>  | <b>3.0307</b>  | <b>0.0088*</b> | <b>88%</b>  |
| <b>65 to 69</b> | 173        | 25        | 14.45%       | 227        | 41        | 15.30%        | 1.21         | 0.7632         | 1.9235         | 0.4156         | 21%         |
| <b>70 to 74</b> | 112        | 18        | 16.07%       | 145        | 38        | 20.77%        | 1.49         | 0.8972         | 2.5069         | 0.1221         | 49%         |
| <b>75 to 79</b> | 71         | 13        | 18.31%       | 104        | 25        | 19.38%        | 1.25         | 0.6795         | 2.3076         | 0.4708         | 25%         |
| <b>80 to 84</b> | 46         | 9         | 19.57%       | 51         | 16        | 23.88%        | 1.45         | 0.7            | 3.0425         | 0.3132         | 45%         |
| <b>85 to 89</b> | 21         | 7         | 33.33%       | 21         | 8         | 27.59%        | 1.10         | 0.4616         | 2.6375         | 0.8248         | 10%         |
| <b>90 to 94</b> | 7          | 4         | 57.14%       | 10         | 3         | 23.08%        | 0.6346       | 0.1794         | 2.2449         | 0.4805         | -37%        |
| <b>95 to 99</b> | 5          | 0         | 0.00%        | 2          | 2         | 50.00%        | 6.00         | 0.3667         | 11.1622        | 0.2089         | 500%        |
| <b>Total</b>    | 4,084      | 137       | 3.35%        | 4,910      | 337       | 6.42%         | 1.9789       | 1.6292         | 2.4035         | 0.0001         | 98%         |

\*p < 0.05
